# Supplementary material
Source: publisher figshare collection journal article supplement (https://karger.figshare.com/articles/dataset/_/5123902)
Supplement: Supplementary file 2 [file 1]

| <b>Type of</b>                   | <b>Si</b> | <b>Mg</b> | <b>Al</b> | <b>Ca</b> | <b>Fe</b> | <b>Na</b> | <b>Ti</b> |
|----------------------------------|-----------|-----------|-----------|-----------|-----------|-----------|-----------|
| <b>Small-</b><br><b>particle</b> | 30.5      | 18.8      | 0.83      | 0.61      | 0.15      | 0.73      | <0.1      |
| <b>Large-</b><br><b>particle</b> | 30.2      | 19        | 0.92      | 0.36      | 0.48      | 0.7       | <0.1      |

**Table E1 (ONLINE)**
