# Supplementary material
Source: publisher figshare collection journal article supplement (https://karger.figshare.com/articles/dataset/_/5123902)
Supplement: Supplementary file 7 [file 1]

Archive with 7 entries (7 files):
- 000342042_sm_Figure_1.pdf
- 000342042_sm_Figure_2.pdf
- 000342042_sm_Figure_3.pdf
- 000342042_sm_Figure_4.pdf
- 000342042_sm_Figure_5.pdf
- 000342042_sm_Suppl_Material.pdf
- 000342042_sm_Table.pdf
