# Supplementary material
Source: publisher figshare collection journal article supplement (https://karger.figshare.com/articles/dataset/_/5123902)

Figure E1 (ONLINE)

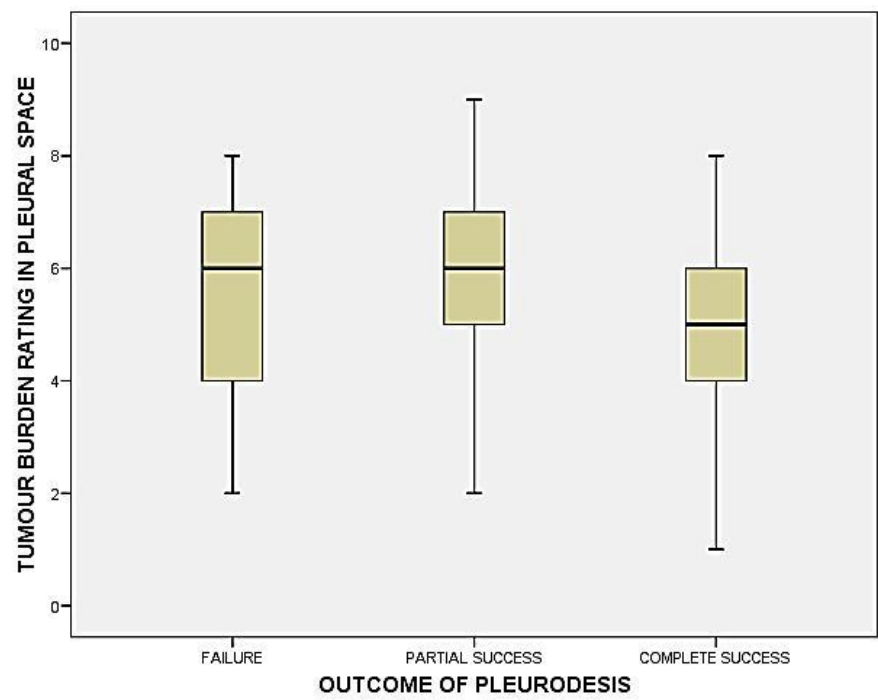

Supplement: Supplementary file 3 [file 1]

**Figure E5A (ONLINE)**

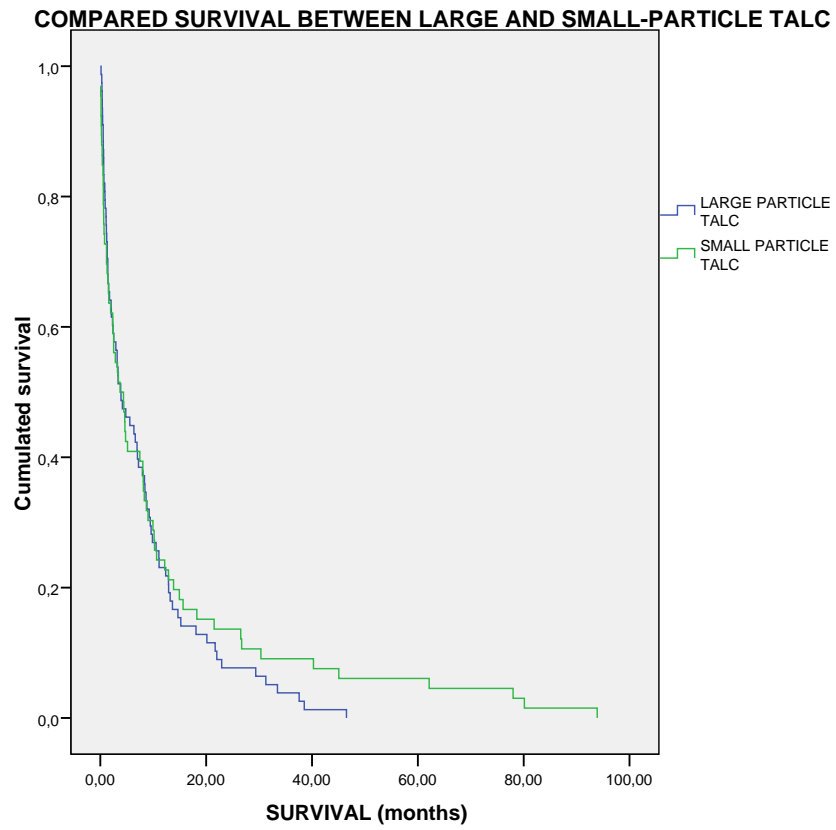

**Figure E5B (ONLINE)**

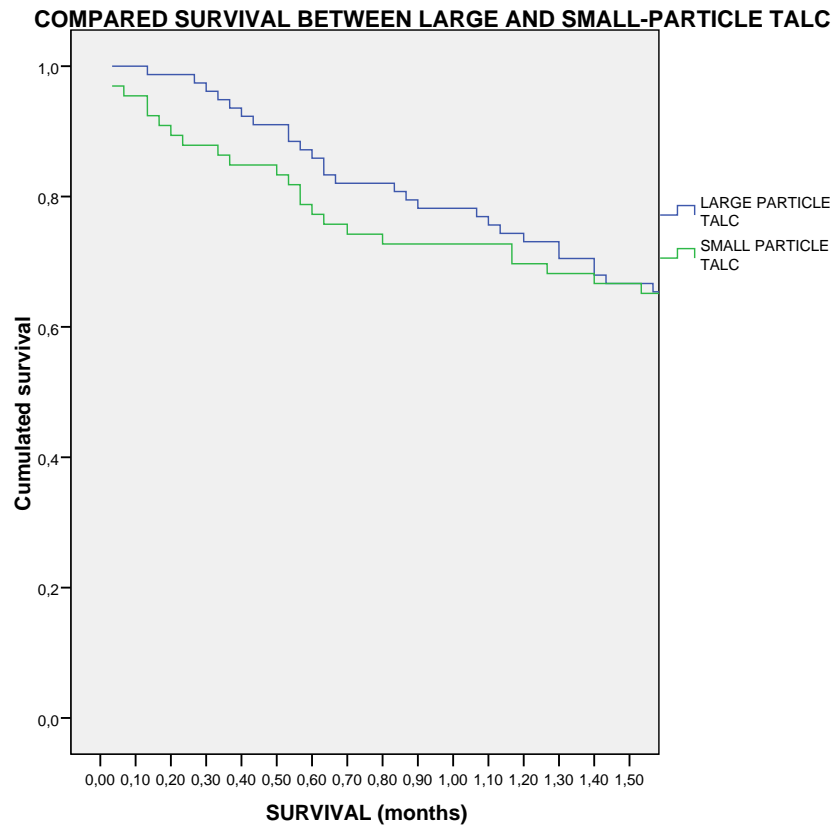

Supplement: Supplementary file 4 [file 1]

**Figure E4 (ONLINE)**

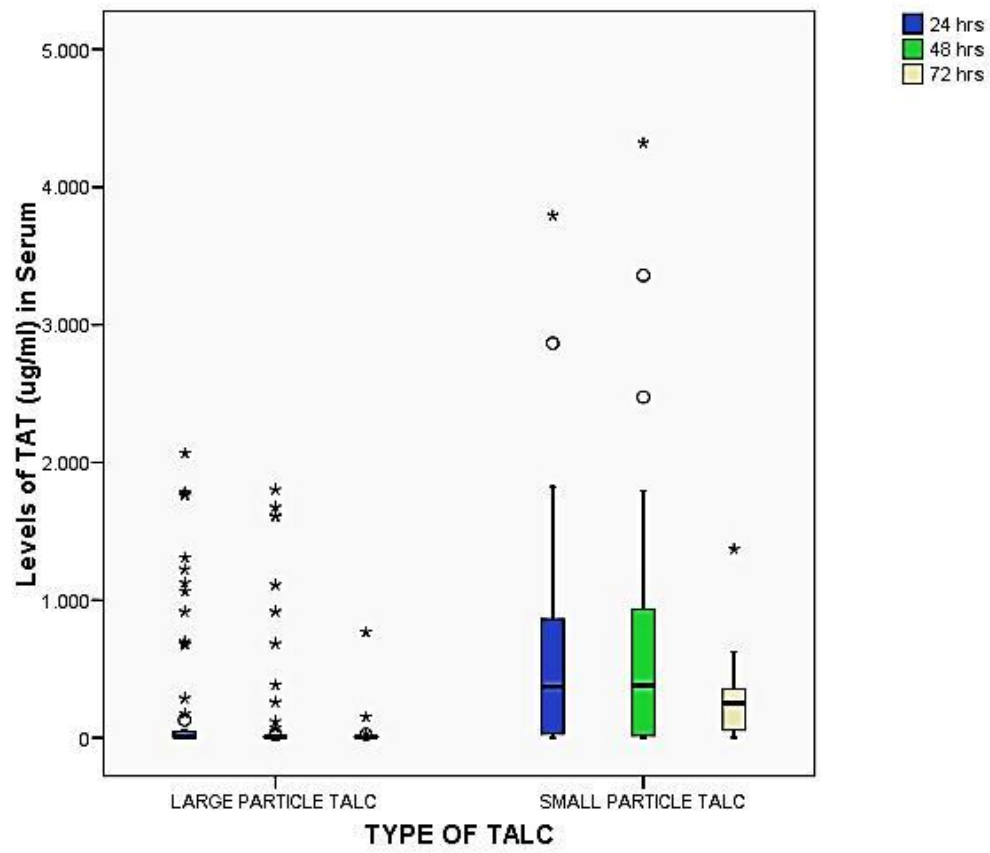

Supplement: Supplementary file 5 [file 1]

Figure E2 (ONLINE)

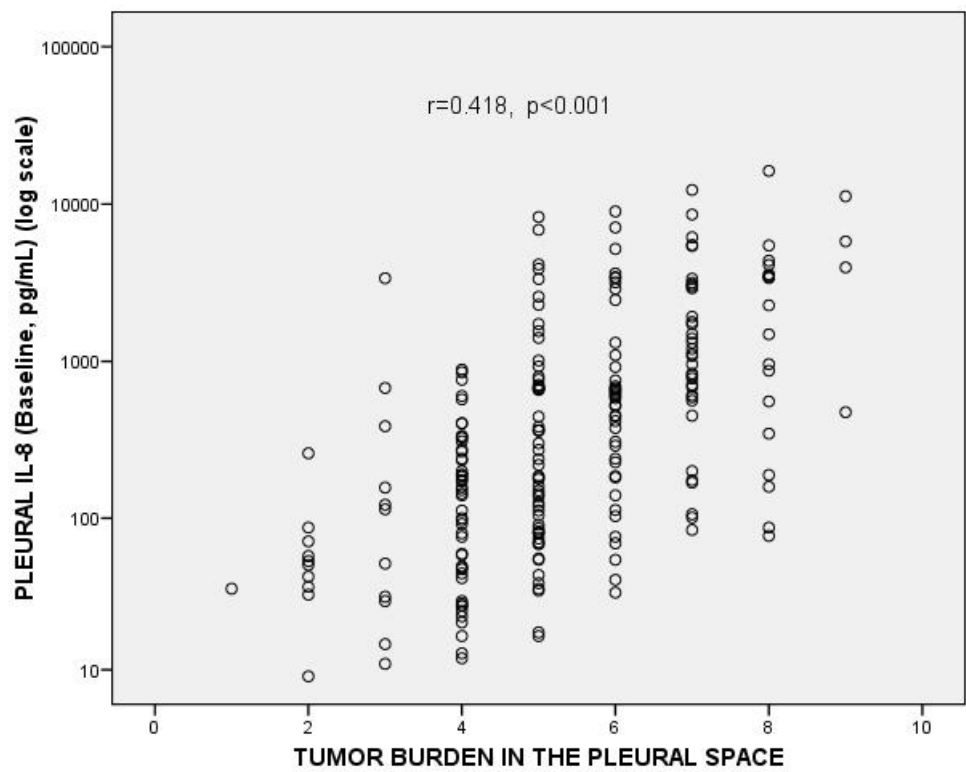

Supplement: Supplementary file 6 [file 1]

**Figure E3 (online)**

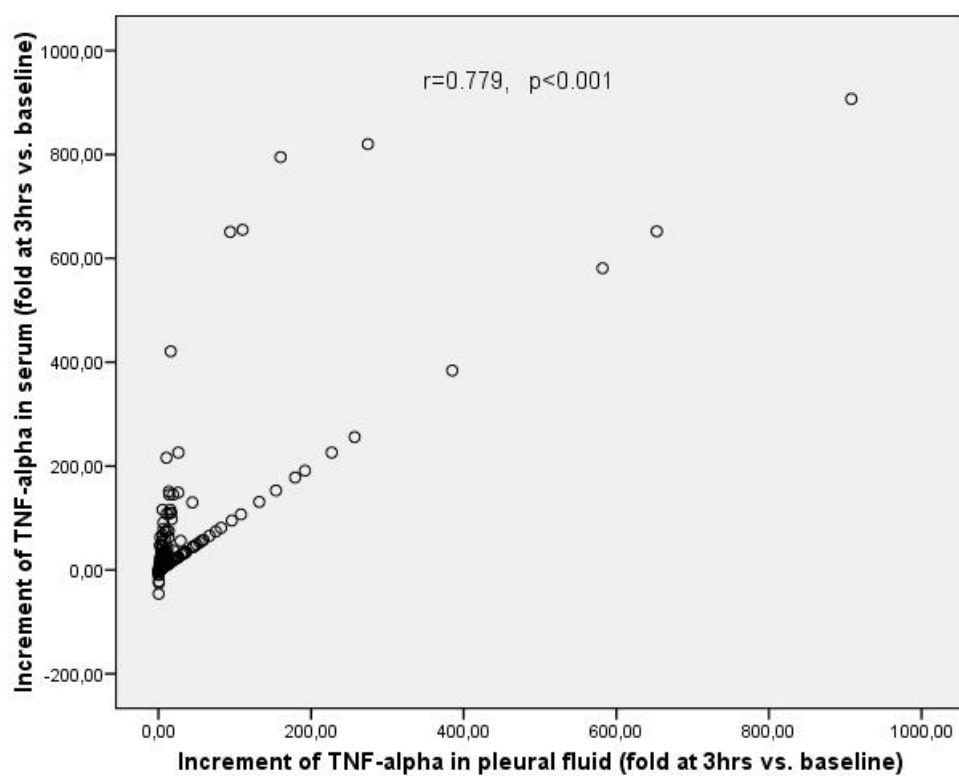

Supplement: Supplementary file 7 [file 1 › 000342042_sm_Figure_3.pdf]
